# Supplementary material for: Violent injury predicts poor psychological outcomes after traumatic injury in a hard-to-reach population: an observational cohort study
Source: PubMed Central journal article supplement — BMJ Open. 2017 May 30;7(5):e014712. doi: 10.1136/bmjopen-2016-014712 (PMC5777458; doi:10.1136/bmjopen-2016-014712), 2017-05-30
Supplement: bmjopen-2016-014712.draft_revisions.pdf [file bmjopen-2016-014712.draft_revisions.pdf]

# BMJ Open

## Violent injury predicts poor psychological outcomes after traumatic injury in a hard to reach population: an observational cohort study

|                                 |                                                                                                                                                                                                                                                                                                                                                                                                                                                  |
|---------------------------------|--------------------------------------------------------------------------------------------------------------------------------------------------------------------------------------------------------------------------------------------------------------------------------------------------------------------------------------------------------------------------------------------------------------------------------------------------|
| Journal:                        | <i>BMJ Open</i>                                                                                                                                                                                                                                                                                                                                                                                                                                  |
| Manuscript ID                   | bmjopen-2016-014712                                                                                                                                                                                                                                                                                                                                                                                                                              |
| Article Type:                   | Research                                                                                                                                                                                                                                                                                                                                                                                                                                         |
| Date Submitted by the Author:   | 12-Oct-2016                                                                                                                                                                                                                                                                                                                                                                                                                                      |
| Complete List of Authors:       | Rahtz, Emmylou; University of Exeter, European Centre for Environment and Human Health<br>bhui, kamaldeep; Barts and The London, Centre for Psychiatry<br>Smuk, Melanie; Queen Mary University of London, Centre for Psychiatry, Wolfson Institute<br>Hutchison, Iain; St Bartholomew's & The Royal London Hospital, Oral & Maxillofacial Surgery<br>Korszun, Ania; Barts and The London School of Medicine and Dentistry, Centre for Psychiatry |
| <b>Primary Subject Heading</b>: | Mental health                                                                                                                                                                                                                                                                                                                                                                                                                                    |
| Secondary Subject Heading:      | Epidemiology, Emergency medicine                                                                                                                                                                                                                                                                                                                                                                                                                 |
| Keywords:                       | MENTAL HEALTH, ORTHOPAEDIC & TRAUMA SURGERY, Depression & mood disorders < PSYCHIATRY                                                                                                                                                                                                                                                                                                                                                            |
|                                 |                                                                                                                                                                                                                                                                                                                                                                                                                                                  |

SCHOLARONE™  
Manuscripts

only

## Violent injury predicts poor psychological outcomes after traumatic injury in a hard to reach population: an observational cohort study

**Authors:** Emmylou Rahtz<sup>1</sup>, Kamaldeep Bhui<sup>2</sup>, Melanie Smuk<sup>2</sup>, Iain Hutchison<sup>3</sup>, Ania Korszun<sup>2</sup>

1. Corresponding Author: [e.rahtz@exeter.ac.uk](mailto:e.rahtz@exeter.ac.uk), University of Exeter, European Centre for Environment and Human Health, Knowledge Spa, Royal Cornwall Hospital, Truro, Cornwall, UK, TR1 3HD, Tel: 01872 258153, Fax: 01872 258134
2. Barts and The London School of Medicine and Dentistry, London, UK
3. St Bartholomew's & The Royal London Hospital, London, UK

**Keywords:** mental health; depression; post traumatic stress disorder; Wounds and Injuries; Violence

**Word count:** 2,746

## Abstract

**Background:** People who experience physical trauma face a range of psychosocial outcomes. These may be overlooked by busy clinicians. While some risk factors are understood, the understanding of the psychological effects of violent injury remains limited, particularly in UK settings. This study compared psychological outcomes following interpersonal violence and accidental injury, including the persistence of psychological distress.

**Methods:** A questionnaire survey was carried out at two time points of patients admitted to a large teaching hospital in London. Participants were consecutive adult patients admitted to the Royal London Hospital with traumatic injuries, with 219 participants at baseline. Follow up survey was eight months later ( $N = 109$ ). Standardised measures assessed symptoms of post-traumatic stress (PTSS) (Acute Stress Disorder Scale, PTSD Checklist) and depression (Hospital Anxiety and Depression Scale).

**Results:** PTSS and depressive symptoms affected 27% and 33% respectively at baseline. At eight months, 27% and 31% respectively reported these symptoms. The repeated measures were assessed with multilevel models: after adjusting for demographic factors, patients with violent injury showed more PTSS ( $OR\ 6.27$ ,  $CI\ 1.90\ to\ 20.66$ ), and depressive symptoms ( $OR\ 3.12$ ,  $CI\ 1.08\ to\ 8.99$ ).

**Conclusions:** There were high levels of psychological distress among traumatic injury patients. Violent injuries were associated with an increased risk of both post-traumatic and depressive symptoms. People vulnerable to distress would benefit from psychological support and hospital admission provides a unique opportunity to engage hard to reach groups in interventions.

## Strengths and limitations of this study

This prospective study accessed a unique and hard to reach urban sample of injured patients, many of whom would typically resist engagement with research[1,2] and health services.[3]

It reports high levels of unmet psychological needs among East London trauma patients, providing local-level information in a field where prevalences and risk factors vary considerably.

The study finds that violent injury is associated with high levels of distress, including high levels of depressive symptoms, eight months after injury.

Follow-up data collection with hard to reach groups is particularly challenging[1] and the significant differences in follow-up participant characteristics pose problems, however, the statistical approach minimised the detrimental effects of this bias.

The findings reinforce the need for routine assessment, intervention and signposting to support services in this population.

## Introduction

Violence and injury pose significant public health problems and violence is a leading cause of death and injury worldwide.[4] There are over 700,000 hospital admissions for accidental and violent injuries each year in England,[5] and 9.2% of injuries occur through violence,[6] with higher rates in metropolitan hospitals,[7] in men and those aged 16 to 25.[8]

There is currently no routine assessment of psychological symptoms in trauma settings,[8] and symptoms of psychological distress are rarely identified by clinical staff.[9,10] However, traumatic injuries have psychological as well as physical consequences.[11] US studies have reported high rates of psychological distress following trauma such as post-traumatic stress disorder (PTSD) and depression.[12–15] PTSD can occur following exposure to, or witnessing, traumatic events such as death, serious injury or sexual violence. Post traumatic symptoms (PTSS) include disturbing flashbacks, avoiding reminders, feelings of alienation and blame, and hyperarousal and reactivity, which persist for at least a month. Acute symptoms within the first month following trauma are recognised as acute stress disorder (ASD). Depression is a mood disorder characterised by depressed mood or loss of interest or pleasure with neurovegetative and cognitive symptoms and significant impairment.

The prevalence of psychological distress following traumatic injury varies widely in different patient populations and countries, however there are few data available on UK rates.[16] An international review, which included one study of motor vehicle collision patients in the UK, reported PTSS rates

1  
2  
3 between 17.5% and 42% up to six months post-injury; the range was greater still at 12 months,  
4 ranging from 2% to 36%.[17] Longitudinal studies show that PTSS prevalence falls over time.[17,18]  
5 American and Australian studies report rates of depressive symptoms ranging from 60% at  
6 baseline,[14] to 31% at six months,[12,14] with rates at one year between 9% and 16%.[11,15] The  
7 variation in prevalence is likely due to differences in location, nature of injury and demographic  
8 profile. Although one UK study of non-violent injuries is in progress,[16] more studies are needed to  
9 plan NHS care.  
10

### 11 *Vulnerability to violent injury*

12 Conflict in the world is increasing, not just in wars but also in civilian settings, through violent  
13 protests, football match violence, armed robbery and street gangs. Civilians injured through violence  
14 are at greater risk of PTSS and more persistent symptoms than those who experience non-violent  
15 injuries.[11,12,19,20] However, there is conflicting evidence on whether violent injury is associated  
16 with depressive symptoms.[12,21] Better recognition and treatment of those at risk of psychological  
17 sequelae would improve their quality of life and functioning.  
18

19 Certain groups are more vulnerable to violent injury, including socio-economically deprived people,  
20 ethnic minorities, and young men,[7,22] and deprivation is often a determinant of violent injuries  
21 with violence being used to secure more resources or to protest about deprivation.[23] Rates of  
22 both violence and poor mental health are high in deprived urban areas.[24] For example, people in  
23 South East London have much higher rates of exposure to trauma than those in other European  
24 inner cities, as well as higher rates of PTSS, mental disorder and substance abuse. [25,26] In Hackney,  
25 East London, 9% of men report belonging to a gang compared with 1% across Britain[27] and East  
26 London boroughs are among those with the highest deprivation in England.[28] Hard to reach  
27 groups – including ethnic minorities, survivors of violence, people living in disadvantaged areas,  
28 those with mental health problems and youths at risk of criminal and gang involvement – are under-  
29 researched,[1] and tend to resist engaging with researchers[2] as well as health services.[3]  
30

31 The variation in rates of psychological distress and the particular challenges in inner cities  
32 demonstrate the need for more ‘local thinking’ on mental health.[26] In this study, we tested the  
33 hypothesis that violent injury is associated with both depressive symptoms and PTSS, and assessed  
34 risk factors for persistence of PTSS and depressive symptoms in patients attending a teaching  
35 hospital and major trauma centre in East London.  
36

### 37 **Methods**

38 This was an observational cohort study of inpatients admitted following accidental or violent injury.  
39  
40  
41  
42  
43  
44  
45  
46  
47  
48  
49  
50  
51  
52  
53  
54  
55  
56  
57  
58  
59  
60

### Setting

Recruitment took place at the Royal London Hospital between July 2012 and April 2014. Participants were identified from consecutive patients discussed at bi-weekly multidisciplinary meetings of the major trauma and oral and maxillofacial surgery teams.

### Participants

The inclusion criteria were: admitted as hospital inpatients under major trauma or oral and maxillofacial trauma; aged 18 or more; English-speaking. The exclusion criteria were: active psychosis; admission following deliberate self-harm; under the influence of alcohol or illegal substances; cognitive impairment.

All participants provided informed consent in writing. Baseline measures were collected in hospital with a follow-up postal questionnaire at eight months. All measures were self-report questionnaires, and we used published thresholds to identify clinically significant symptoms.

### Measures

Baseline PTSS were measured using the Acute Stress Disorder Scale (ASDS),<sup>[29]</sup> with a threshold of scores  $\geq 56$ . Follow up PTSS were measured using the PTSD Checklist – Specific version (PCL-S),<sup>[30]</sup> with a threshold of scores  $\geq 45$ . Depressive symptoms at baseline and follow up were measured using the Hospital Anxiety and Depression Scale (HADS),<sup>[31]</sup> with a threshold of scores  $\geq 8$ . Mechanism of injury was established from clinical information and provided a binary exposure variable of violent or accidental injury. Demographic information was also collected.

### Statistical analysis

It was calculated that a sample size of 67 in each group was required to test the hypothesis that mean scores on the PCL-S would be at least five points higher among participants injured through violence than among those injured accidentally. Smaller numbers were required for the HADS. Higher numbers were sought at baseline because of anticipated difficulties in following up participants.

Sensitivity analyses used univariate logistic regressions to explore differences in follow up. To understand simple associations in the data, we used Chi squared tests and univariate logistic regressions. To test the longitudinal hypotheses, we used logistic multilevel models for repeated measures, with bootstrapping to produce more robust confidence intervals. Multilevel models allowed all participants' questionnaires to be included in the final statistical models whether participants had contributed to one or both waves, thus increasing statistical power. Missing data were not imputed. Outcomes for PTSS and depressive symptoms were assessed separately. When

1  
2  
3 adjusting multilevel models, they were subjected to a likelihood ratio test after estimation to ensure  
4 optimal modelling of the variation.  
5

6  
7 We considered P values of less than 0.05 to be statistically significant. Statistical analyses were  
8 carried out using Stata statistical software (version 14). Power calculations were carried out using  
9 G\*Power (version 3.1.7).  
10  
11

## 12 Results

### 13 *Description of the data*

14  
15 Of 829 patients admitted to the ward during the study period, 467 met the study criteria. Of these,  
16 225 (48.2%) consented to take part, 219 (46.9%) of whom provided useable baseline data. Baseline  
17 measures were collected within 21 days after injury (mean days 4.27, *CI* 3.72 to 4.82). The main  
18 reason patients were excluded was a lack of an opportunity to approach patients due to surgical or  
19 rehabilitation procedures, or excessive pain or nausea (22.9%, *N* = 190). Recruitment to the study did  
20 not differ by age or gender.  
21  
22

23  
24 Of the 219 baseline participants, 109 (49.8%) responded to follow up at eight months (mean days  
25 228.23, *CI* 218.18 to 238.28), providing a total of 328 questionnaires for use in multilevel models.  
26  
27 Reasons for loss to follow up were not known.  
28  
29

30  
31 There were significant group differences in those who did follow up. Participants injured through  
32 interpersonal violence were significantly less likely to respond to follow up (*OR* 0.29, *CI* 0.16 to 0.52),  
33 as were those with clinically significant PTSS (*OR* 0.36, *CI* 0.19 to 0.67) or depressive symptoms (*OR*  
34 0.40, *CI* 0.22 to 0.72) at baseline.  
35  
36  
37  
38

### 39 *Sample characteristics*

40  
41 Participants were predominantly male and young; over a third of participants had been injured  
42 through interpersonal violence (Table 1). Violent injury was more common among young, male and  
43 ethnic minority groups. Among the violently injured group, 34 (44.7%) had been injured through  
44 suspected gang violence. Violence was more common among young, male and ethnic minority  
45 groups.  
46  
47  
48  
49  
50  
51  
52  
53  
54  
55  
56  
57  
58  
59  
60

|                  |                        | N   | (Column %) | % injured violently |
|------------------|------------------------|-----|------------|---------------------|
| <b>Total</b>     |                        | 219 | (100.00)   | 34.70               |
| <b>Gender</b>    | Male                   | 166 | (75.80)    | 39.76               |
|                  | Female                 | 53  | (24.20)    | 18.87               |
| <b>Age</b>       | 18-25                  | 57  | (26.03)    | 50.88               |
|                  | 26-35                  | 59  | (26.94)    | 42.37               |
|                  | 36-45                  | 43  | (19.63)    | 37.21               |
|                  | 46-65                  | 42  | (19.18)    | 11.90               |
|                  | 66+                    | 18  | (8.22)     | 5.56                |
| <b>Ethnicity</b> | White, White British   | 163 | (74.43)    | 24.54               |
|                  | Black, Black British   | 23  | (10.50)    | 78.26               |
|                  | Asian, Asian British   | 17  | (7.76)     | 52.94               |
|                  | Mixed, Multiple, Other | 16  | (7.31)     | 56.25               |

Table 1: Demographics for all participants at baseline

### Outcome data

More than one quarter of participants reported PTSS, both among all baseline participants, and among those responding at eight months (Figure 1). PTSS were more common after violent injury. Exact values are provided in the appendix (Table 2).

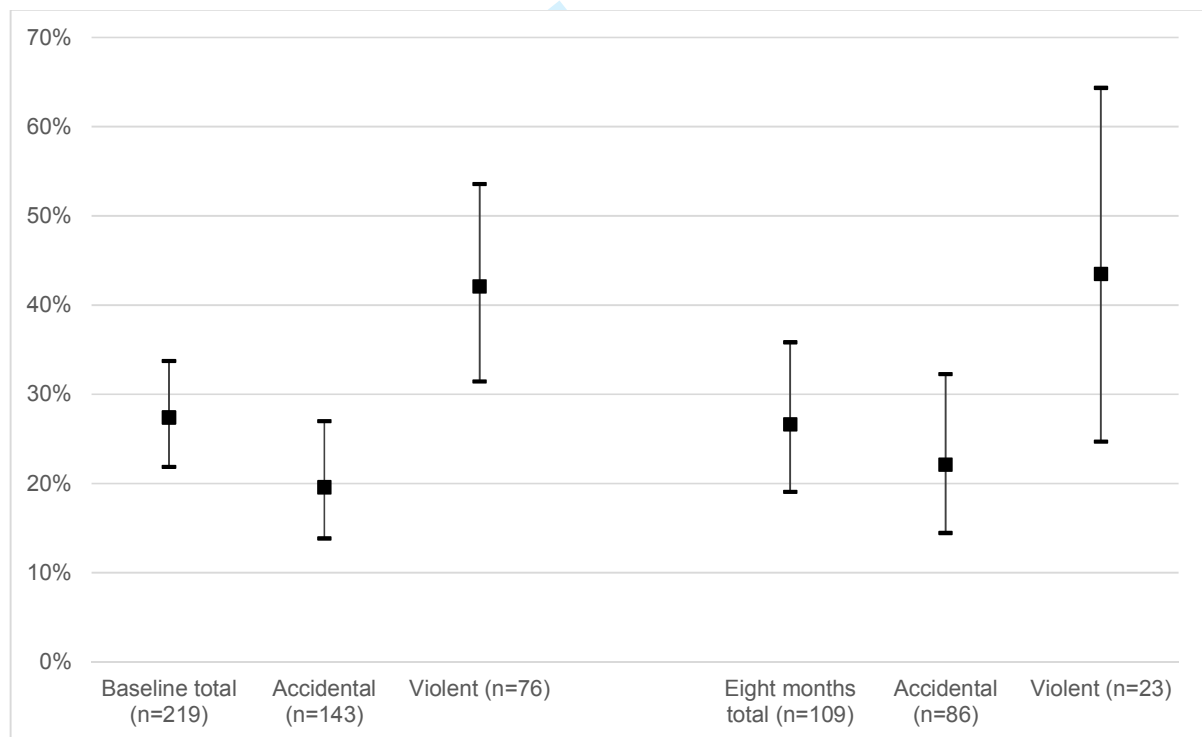

Figure 1: Prevalence of clinically significant PTSS at baseline and eight months. Threshold: ASDS  $\geq 56$  at baseline, PCL-5  $\geq 44$  at eight months.



Almost one third of participants reported depressive symptoms at baseline and at eight months (Figure 2). Those injured violently were more likely to have depressive symptoms. Exact values are provided in the appendix (Table 3).

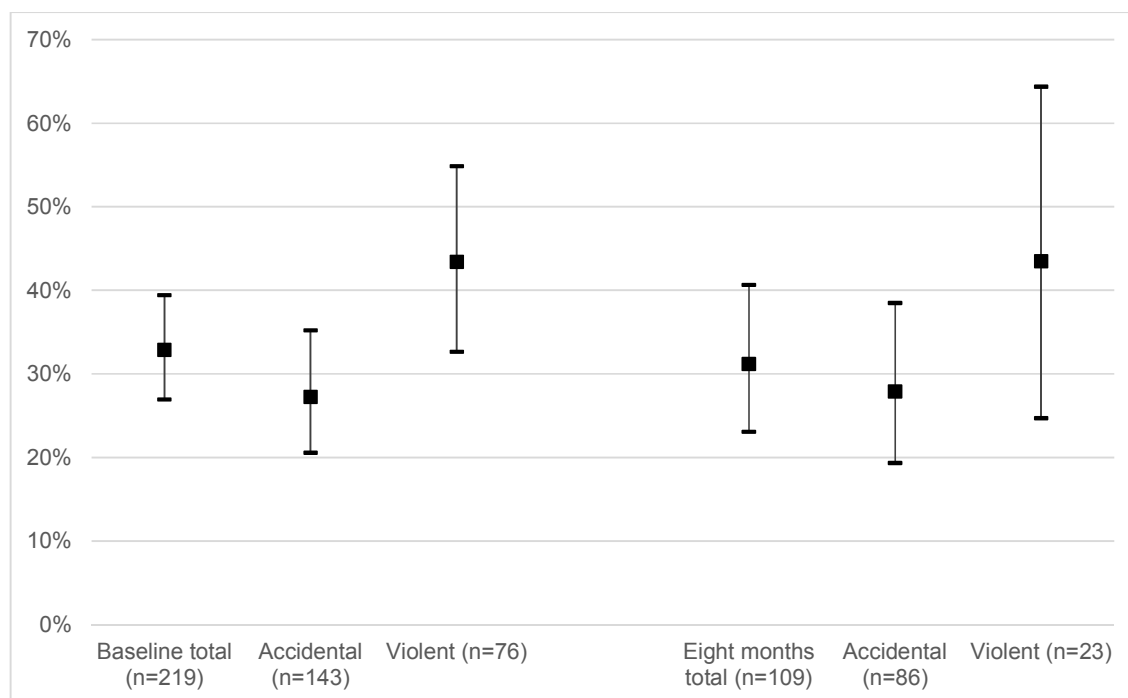

Figure 2: Prevalence of clinically significant depressive symptoms at baseline and eight months. Threshold HADS-D  $\geq 8$ .

### Main results

In longitudinal models, violent injury significantly increased the odds of PTSS (unadjusted *OR* 6.41, *CI* 2.05 to 20.04; adjusted for age and gender *OR* 6.27, *CI* 1.90 to 20.66) and depressive symptoms (unadjusted *OR* 3.47, *CI* 1.26 to 9.57; adjusted for age and gender *OR* 3.12, *CI* 1.08 to 8.99).

## Discussion

### Principal findings

This is the first UK prospective study of the persistence of psychological distress in people admitted with injuries to an inner city major trauma centre. The prevalence of both PTSS and depressive symptoms was high at baseline and follow up, with over a quarter of participants experiencing clinically significant symptoms of PTSS and up to a third reporting clinically significant symptoms of depression. These figures are likely to be underestimates as follow-up rates among those with psychological distress were lower. These rates are substantially higher than the 5.5% prevalence of PTSD in a London community sample[25] and 11.4% prevalence of depressive symptoms in the UK general population.[32] A large proportion of participants in this study represent a group that is hard to engage in follow up and into research studies. The sample comprised predominantly young men

1  
2  
3 and over a third of participants had been injured through interpersonal violence. Violent injury was  
4 more common among young, male and ethnic minority groups and 44.7% of these individuals had  
5 been injured through suspected gang violence.  
6  
7

8  
9 Previous studies in other countries have reported that rates of psychological distress following injury  
10 decrease over time.[17,18] However, in this population, symptoms persisted and this may be partly  
11 due to the high proportion of participants injured through violence, as PTSS have been shown to  
12 remain high among victims of violence.[11,20] We found that the prevalence of depressive  
13 symptoms in the overall sample also remained high, which has not been described previously.  
14  
15

16  
17 Violent injury was a significant risk factor for both PTSS and depressive symptoms, increasing the  
18 odds of PTSS by a factor of six (*OR* 6.27, *CI* 1.90 to 20.66), and the odds of depressive symptoms by a  
19 factor of three (*OR* 3.12, *CI* 1.08 to 8.99). This increased risk of depressive symptoms following  
20 violent injury accords with one previous study.[21]  
21  
22  
23

### 24 **Strengths and limitations**

25 This study accessed a unique and hard to reach urban sample of injured patients, many of whom  
26 would typically resist engagement with research[1,2] and health services.[3] It provides local-level  
27 information in a field where prevalences and risk factors vary considerably.  
28  
29  
30

31 Follow-up data collection with hard to reach groups is particularly challenging[1] and the significant  
32 differences in follow-up participant characteristics pose problems. However, the statistical approach  
33 minimised the detrimental effects of this bias. The prevalences reported at follow up are likely to be  
34 an underestimate: this reinforces the need for routine assessment, intervention and signposting to  
35 support services in this population. The modest sample size prevented further adjustments to the  
36 model, such as ethnicity or suspected gang violence. It was not possible to use a clinical interview to  
37 confirm suspected psychiatric diagnoses.  
38  
39  
40  
41  
42

### 43 **Implications**

44 Given the high prevalence and persistence of distress in injury victims, there are clearly unidentified  
45 and unmet needs. In the high pressure environment of trauma care, and in longer term recovery  
46 from trauma, remarkably little attention is paid to mental health. NHS guidelines favour 'watchful  
47 waiting' for PTSS, with a follow up at one month. However, the present findings suggest that early  
48 identification and intervention may be essential in some cases. This concurs with the suggestions of  
49 others studying trauma.[33,34]  
50  
51  
52  
53

54  
55 Traumatic injury patients, including those with significant psychological symptoms, often lack insight  
56 into their conditions[35] and can struggle to access counselling services.[36] This puts a greater onus  
57  
58  
59  
60

1  
2  
3 on healthcare workers to identify individuals at risk.[9] Trauma settings need appropriate staff to  
4 assess patients' psychological needs and to initiate the delivery of care.  
5

6  
7 Stereotyped attitudes to trauma patients may create a further barrier to psychological care, with  
8 some staff in primary and secondary care believing that patients are themselves responsible for their  
9 injuries and that they do not merit psychological support.[36,37] Furthermore, trauma healthcare  
10 workers in the UK report that the environment is not conducive to forming therapeutic relationships,  
11 and that there is a gap between the ideal, compassionate care they would like to provide, and the  
12 time-pressured reality.[38] Gaps can occur in the transfer from secondary and primary care, where  
13 there is a need for continuity.[36,39]  
14  
15

16  
17 Young people involved in gangs are likely to have poor experiences of healthcare, as well as  
18 educational and social care systems.[1] Trauma care is one of the key contact points within these  
19 systems where intervention may be possible, and it has been suggested that, in areas where gang  
20 activity is common, all individuals being treated by health services should be asked about gang  
21 membership.[27] Hospital admission may thus provide a unique opportunity for intervention. An  
22 American intervention targeted hospitalised teenagers with evidence of violent behaviour and  
23 alcohol use: a brief hospital intervention improved violent behaviour and reduced alcohol use at  
24 follow up.[40] Such initiatives can be highly effective, and could help seize unique 'teachable  
25 moments'.  
26  
27  
28  
29  
30  
31  
32  
33  
34  
35  
36

37 **Contributors:** ER participated in the design, data collection, data analysis, and manuscript  
38 preparation. KB participated in the design, data analysis and manuscript preparation. MS  
39 participated in data analysis. IH participated in the receipt of funding, design and data collection. AK  
40 participated in the receipt of funding, design, data collection and manuscript preparation. All  
41 authors contributed to manuscript development and approved the final version, and agree to be  
42 accountable for all aspects of the work.  
43  
44  
45  
46

47 **Competing interests:** None declared.  
48

49 **Funding:** This work was supported by The Facial Surgery Research Foundation – Saving Faces.  
50  
51

52 **Acknowledgements:** The authors acknowledge the support of the Centre for Trauma Sciences for  
53 enabling fieldwork to be undertaken.  
54  
55  
56  
57  
58  
59  
60

**Ethical approval:** We obtained written ethical approval for the study from the National Research Ethics Service (NRES), the NHS Health Research Authority, Camberwell St Giles Committee (ID: 12/LO/0351).

**Patient consent:** All participants gave written informed consent before taking part. No identifiable medical information is included in this article.

**Data sharing:** No additional data are available.

## References

- 1 Bonevski B, Randell M, Paul C, *et al*. Reaching the hard-to-reach: a systematic review of strategies for improving health and medical research with socially disadvantaged groups. *BMC Med Res Methodol* 2014;**14**:42. doi:10.1186/1471-2288-14-42
- 2 Ellard-Gray A, Jeffrey NK, Choubak M, *et al*. Finding the Hidden Participant: Solutions for Recruiting Hidden, Hard-to-Reach, and Vulnerable Populations. *Int J Qual Methods* 2015;**14**:1–10. doi:10.1177/1609406915621420
- 3 Flanagan SM, Hancock B. 'Reaching the hard to reach'--lessons learned from the VCS (voluntary and community Sector). A qualitative study. *BMC Health Serv Res* 2010;**10**:92. doi:10.1186/1472-6963-10-92
- 4 Krug EG, Mercy J a, Dahlberg LL, *et al*. World report on violence and health. *Biomedica* 2002;**22 Suppl 2**:327–36. doi:10.1136/jech.57.12.994-a
- 5 HSCIC. Hospital Episode Statistics: Admitted Patient Care, England 2014-2015: External causes. 2015;:1–34. <http://www.hscic.gov.uk/catalogue/PUB19124> (accessed 4 Apr2015).
- 6 NCEPOD. Trauma: Who Cares? A Report of the National Confidential Enquiry Into Patient Outcome and Death. 2007. [www.ncepod.org.uk/2007report2/Downloads/SIP\\_report.pdf](http://www.ncepod.org.uk/2007report2/Downloads/SIP_report.pdf) (accessed 20 May2014).
- 7 Hutchison I, Magennis P. The BAOMS United Kingdom survey of facial injuries part 1: aetiology and the association with alcohol consumption. *Br J Oral Maxillofac Surg* 1998;**36**:3–13. doi:dx.doi.org/10.1016/S0266-4356(98)90739-2
- 8 Morse A, Fisher A, Ross C. Major trauma care in England. London: 2010. [www.nao.org.uk/trauma2010](http://www.nao.org.uk/trauma2010) (accessed 20 May2014).
- 9 Bolduc A, Hwang B, Hogan C, *et al*. Identification and referral of patients at risk for post-traumatic stress disorder: A literature review and retrospective analysis. *Am Surg* 2015;**81**:904–8.
- 10 Islam S, Hooi H, Hoffman GR. Presence of pre-existing psychological comorbidity in a group of facially injured patients: a preliminary investigation. *J Oral Maxillofac Surg* 2009;**67**:1889–94. doi:10.1016/j.joms.2009.04.044
- 11 Bryant RA, O'Donnell ML, Creamer M, *et al*. The psychiatric sequelae of traumatic injury. *Am J Psychiatry* 2010;**167**:312–20. doi:10.1176/appi.ajp.2009.09050617

- 1  
2  
3 12 Shih R, Schell T. Prevalence of PTSD and Major Depression Following Trauma-Center  
4 Hospitalization. *J Trauma* 2010;**69**:1560–6. doi:10.1097/TA.0b013e3181e59c05  
5  
6 13 Zatzick DF, Rivara FP, Nathens AB, *et al.* A nationwide US study of post-traumatic stress after  
7 hospitalization for physical injury. *Psychol Med* 2007;**37**:1469–80.  
8 doi:10.1017/S0033291707000943  
9  
10 14 Holbrook T. Outcome after major trauma: discharge and 6-month follow-up results from the  
11 Trauma Recovery Project. *J Trauma* 1998;**45**. doi:dx.doi.org/10.1097/00005373-199808000-  
12 00018  
13  
14 15 Schnyder U, Moergeli H, Trentz O, *et al.* Prediction of psychiatric morbidity in severely injured  
15 accident victims at one-year follow-up. *Am J Respir Crit Care Med* 2001;**164**:653–6.  
16 doi:http://dx.doi.org/10.1164/ajrccm.164.4.2008087  
17  
18 16 Kendrick D, O'Brien C, Christie N, *et al.* The impact of injuries study. Multicentre study  
19 assessing physical, psychological, social and occupational functioning post injury - a protocol.  
20 *BMC Public Health* 2011;**11**:963. doi:10.1186/1471-2458-11-963  
21  
22 17 O'Donnell ML, Creamer M, Bryant RA, *et al.* Posttraumatic disorders following injury: an  
23 empirical and methodological review. *Clin Psychol Rev* 2003;**23**:587–603. doi:10.1016/S0272-  
24 7358(03)00036-9  
25  
26 18 Haagsma JA, Polinder S, Toet H, *et al.* Beyond the neglect of psychological consequences:  
27 posttraumatic stress disorder increases the non-fatal burden of injury by more than 50%. *Inj*  
28 *Prev* 2011;**16**:A247–A247. doi:10.1136/ip.2010.029215.878  
29  
30 19 Lim BHP, Adams LA, Lilly MM. Self-worth as a mediator between attachment and  
31 posttraumatic stress in interpersonal trauma. *J Interpers Violence* 2012;**27**:2039–61.  
32 doi:10.1177/0886260511431440  
33  
34 20 Johansen VA, Wahl AK, Weisaeth L. Assaulted victims of nondomestic violence in Norway--  
35 injury, crime characteristics and emotions during the assault. *Scand J Caring Sci* 2008;**22**:445–  
36 54. doi:10.1111/j.1471-6712.2007.00550.x  
37  
38 21 DeRoos-Cassini TA, Mancini AD, Rusch MD, *et al.* Psychopathology and resilience following  
39 traumatic injury: a latent growth mixture model analysis. *Rehabil Psychol* 2010;**55**:1–11.  
40 doi:10.1037/a0018601  
41  
42 22 Lee KH. Interpersonal violence and facial fractures. *J Oral Maxillofac Surg* 2009;**67**:1878–83.  
43 doi:10.1016/j.joms.2009.04.117  
44  
45 23 Herrenkohl TI, Maguin E, Hill KG, *et al.* Developmental risk factors for youth violence. *J*  
46 *Adolesc Health* 2000;**26**:176–86. doi:dx.doi.org/10.1016/S1054-139X(99)00065-8  
47  
48 24 Hatch SL, Frissa S, Verdecchia M, *et al.* Identifying socio-demographic and socioeconomic  
49 determinants of health inequalities in a diverse London community: the South East London  
50 Community Health (SELCoH) study. *BMC Public Health* 2011;**11**:861. doi:10.1186/1471-2458-  
51 11-861  
52  
53 25 Frissa S, Hatch SL, Gizard B, *et al.* Trauma and current symptoms of PTSD in a South East  
54 London community. *Soc Psychiatry Psychiatr Epidemiol* 2013;**48**:1199–209.  
55 doi:10.1007/s00127-013-0689-8  
56  
57 26 Hatch SL, Woodhead C, Frissa S, *et al.* Importance of Thinking Locally for Mental Health: Data  
58  
59  
60

- 1  
2  
3 from Cross-Sectional Surveys Representing South East London and England. *PLoS One* 2012;**7**.  
4 doi:10.1371/journal.pone.0048012  
5  
6 27 Coid JW, Ullrich S, Keers R, *et al*. Gang membership, violence, and psychiatric morbidity. *Am J*  
7 *Psychiatry* 2013;**170**:985–93. doi:10.1176/appi.ajp.2013.12091188  
8  
9 28 McLennan D, Barnes H, Noble M, *et al*. The English Indices of Deprivation 2010. London: 2010.  
10  
11 29 Bryant RA, Moulds ML, Guthrie RM. Acute Stress Disorder Scale : A Self-Report Measure of  
12 Acute Stress Disorder. *Psychol Assess* 2000;**12**:61–8. doi:10.1037//1040-3590.12.1.61  
13  
14 30 Blanchard E. Psychometric properties of the PTSD checklist (PCL). *Behav Res Ther*  
15 1996;**34**:669–73. doi:10.1016/0005-7967(96)00033-2  
16  
17 31 Zigmond AS, Snaith RP. The Hospital Anxiety and Depression Scale. *Acta Psychiatr Scand*  
18 1983;**67**:361–70. doi:dx.doi.org/10.1111/j.1600-0447.1983.tb09716.x  
19  
20 32 Crawford J, Henry J. Normative data for the HADS from a large non-clinical sample. *Br J Clin*  
21 *Psychol* 2001;**40**:429–34. doi:dx.doi.org/10.1348/014466501163904  
22  
23 33 Alarcon LH, Germain A, Clontz AS, *et al*. Predictors of acute posttraumatic stress disorder  
24 symptoms following civilian trauma: highest incidence and severity of symptoms after assault.  
25 *J Trauma Acute Care Surg* 2012;**72**:629-35-7. doi:10.1097/TA.0b013e31824416aa  
26  
27 34 Stephens KA, Sue S, Roy-Byrne P, *et al*. Ethnoracial variations in acute PTSD symptoms among  
28 hospitalized survivors of traumatic injury. *J Trauma Stress* 2010;**23**:384–92.  
29 doi:10.1002/jts.20534  
30  
31 35 Wong E, Kennedy D. Making sense of posttraumatic stress disorder: Illness perceptions  
32 among traumatic injury survivors. *Psychol Trauma* 2011;**3**:67–76. doi:10.1037/a0020587  
33  
34 36 Christie N, Beckett K, Earthy S, *et al*. Seeking support after hospitalisation for injury: a nested  
35 qualitative study of the role of primary care. *Br J Gen Pract* 2016;**66**:e24–31.  
36 doi:10.3399/bjgp15X688141  
37  
38 37 Shepherd JP. Victims of Personal Violence: The Relevance of Symonds' Model of Psychological  
39 Response and Loss-Theory. *Br J Soc Work* 1990;**20**:309–  
40 32.<http://bjsw.oxfordjournals.org/content/20/4/309.short> (accessed 13 Mar2013).  
41  
42 38 Beckett K, Earthy S, Sleney J, *et al*. Providing effective trauma care: the potential for service  
43 provider views to enhance the quality of care (qualitative study nested within a multicentre  
44 longitudinal quantitative study). *BMJ Open* 2014;**4**:e005668–e005668. doi:10.1136/bmjopen-  
45 2014-005668  
46  
47 39 Kellezi B, Beckett K, Earthy S, *et al*. Understanding and meeting information needs following  
48 unintentional injury: Comparing the accounts of patients, carers and service providers. *Injury*  
49 2015;**46**:564–71. doi:10.1016/j.injury.2014.11.035  
50  
51 40 Walton MA, Chermack ST, Shope JT, *et al*. Effects of a brief intervention for reducing violence  
52 and alcohol misuse among adolescents: a randomized controlled trial. *JAMA* 2010;**304**:527–  
53 35. doi:10.1001/jama.2010.1066  
54  
55  
56  
57  
58  
59  
60

## Appendix

Table 2: Prevalence of clinically significant PTSS at each time point

| Variable  | Values                 | Baseline: ASDS $\geq 56$ |          | Eight months: PCL-S $\geq 44$ |          |
|-----------|------------------------|--------------------------|----------|-------------------------------|----------|
| Total     |                        | 60/219                   | (27.40%) | 29/109                        | (26.61%) |
| Gender    | Male                   | 46/166                   | (27.71%) | 19/79                         | (24.05%) |
|           | Female                 | 14/53                    | (26.42%) | 10/30                         | (33.33%) |
| Age       | 18-25                  | 14/57                    | (24.56%) | 6/19                          | (31.58%) |
|           | 26-35                  | 19/59                    | (32.20%) | 9/30                          | (30.00%) |
|           | 36-45                  | 13/43                    | (30.23%) | 8/22                          | (36.36%) |
|           | 46-65                  | 11/42                    | (26.19%) | 5/25                          | (20.00%) |
|           | 66+                    | 3/18                     | (16.67%) | 1/13                          | (7.69%)  |
| Ethnicity | White, White British   | 37/163                   | (22.70%) | 20/90                         | (22.22%) |
|           | Black, Black British   | 12/23                    | (52.17%) | 5/8                           | (62.50%) |
|           | Asian, Asian British   | 6/17                     | (35.29%) | 2/5                           | (40.00%) |
|           | Mixed, Multiple, Other | 5/16                     | (31.25%) | 2/6                           | (33.33%) |
| Mechanism | Violent injury         | 28/143                   | (19.58%) | 19/86                         | (22.09%) |
|           | Accidental injury      | 32/76                    | (42.11%) | 10/23                         | (43.48%) |

Table 3: Prevalence of clinically significant depressive symptoms at each time point

| Variable  | Values                 | Baseline: HADS-D $\geq 8$ |          | Eight months: HADS-D $\geq 8$ |          |
|-----------|------------------------|---------------------------|----------|-------------------------------|----------|
| Total     |                        | 72/219                    | (32.88%) | 34/109                        | (31.19%) |
| Gender    | Male                   | 51/166                    | (30.72%) | 24/79                         | (30.38%) |
|           | Female                 | 21/53                     | (39.62%) | 10/30                         | (33.33%) |
| Age       | 18-25                  | 19/57                     | (33.33%) | 6/19                          | (31.58%) |
|           | 26-35                  | 19/59                     | (32.20%) | 12/30                         | (40.00%) |
|           | 36-45                  | 18/43                     | (41.86%) | 8/22                          | (36.36%) |
|           | 46-65                  | 13/42                     | (30.95%) | 5/25                          | (20.00%) |
|           | 66+                    | 3/18                      | (16.67%) | 3/13                          | (23.08%) |
| Ethnicity | White, White British   | 43/163                    | (26.38%) | 23/90                         | (25.56%) |
|           | Black, Black British   | 13/23                     | (56.52%) | 7/8                           | (87.50%) |
|           | Asian, Asian British   | 10/17                     | (58.82%) | 2/5                           | (40.00%) |
|           | Mixed, Multiple, Other | 6/16                      | (37.50%) | 2/6                           | (33.33%) |
| Mechanism | Violent injury         | 39/143                    | (27.27%) | 24/86                         | (27.91%) |
|           | Accidental injury      | 33/76                     | (43.42%) | 10/23                         | (43.48%) |

STROBE Statement—for article ‘Violent injury predicts poor psychological outcomes after traumatic injury in a hard to reach population: an observational cohort study’

Checklist of items that should be included in reports of *cohort studies*

|                              | Item No | Recommendation                                                                                                                                                                       | Status          |
|------------------------------|---------|--------------------------------------------------------------------------------------------------------------------------------------------------------------------------------------|-----------------|
| <b>Title and abstract</b>    | 1       | (a) Indicate the study’s design with a commonly used term in the title or the abstract                                                                                               | Done: page 2    |
|                              |         | (b) Provide in the abstract an informative and balanced summary of what was done and what was found                                                                                  | Done: page 2    |
| <b>Introduction</b>          |         |                                                                                                                                                                                      |                 |
| Background/rationale         | 2       | Explain the scientific background and rationale for the investigation being reported                                                                                                 | Done: page 3,4  |
| Objectives                   | 3       | State specific objectives, including any prespecified hypotheses                                                                                                                     | Done: page 4    |
| <b>Methods</b>               |         |                                                                                                                                                                                      |                 |
| Study design                 | 4       | Present key elements of study design early in the paper                                                                                                                              | Done: page 4    |
| Setting                      | 5       | Describe the setting, locations, and relevant dates, including periods of recruitment, exposure, follow-up, and data collection                                                      | Done: page 5    |
| Participants                 | 6       | (a) Give the eligibility criteria, and the sources and methods of selection of participants. Describe methods of follow-up                                                           | Done: page 5    |
|                              |         | (b) For matched studies, give matching criteria and number of exposed and unexposed                                                                                                  | Not applicable  |
| Variables                    | 7       | Clearly define all outcomes, exposures, predictors, potential confounders, and effect modifiers. Give diagnostic criteria, if applicable                                             | Done: page 5    |
| Data sources/<br>measurement | 8*      | For each variable of interest, give sources of data and details of methods of assessment (measurement). Describe comparability of assessment methods if there is more than one group | Done: page 5    |
| Bias                         | 9       | Describe any efforts to address potential sources of bias                                                                                                                            | Done: page 5    |
| Study size                   | 10      | Explain how the study size was arrived at                                                                                                                                            | Done: page 5    |
| Quantitative variables       | 11      | Explain how quantitative variables were handled in the analyses. If applicable, describe which groupings were chosen and why                                                         | Done: page 5    |
| Statistical methods          | 12      | (a) Describe all statistical methods, including those used to control for confounding                                                                                                | Done: page 5, 6 |
|                              |         | (b) Describe any methods used to examine subgroups and interactions                                                                                                                  | Done: page 5, 6 |
|                              |         | (c) Explain how missing data were addressed                                                                                                                                          | Done: page 5    |
|                              |         | (d) If applicable, explain how loss to follow-up was addressed                                                                                                                       | Done: page 5    |
|                              |         | (e) Describe any sensitivity analyses                                                                                                                                                | Done: page 5    |
| <b>Results</b>               |         |                                                                                                                                                                                      |                 |
| Participants                 | 13*     | (a) Report numbers of individuals at each stage of study— eg numbers potentially eligible, examined for eligibility,                                                                 | Done: page 6    |



|                          |     |                                                                                                                                                                                                              |                                        |
|--------------------------|-----|--------------------------------------------------------------------------------------------------------------------------------------------------------------------------------------------------------------|----------------------------------------|
|                          |     | confirmed eligible, included in the study, completing follow-up, and analysed                                                                                                                                |                                        |
|                          |     | (b) Give reasons for non-participation at each stage                                                                                                                                                         | Done (to the extent possible) : page 6 |
|                          |     | (c) Consider use of a flow diagram                                                                                                                                                                           | No flow diagram                        |
| Descriptive data         | 14* | (a) Give characteristics of study participants (eg demographic, clinical, social) and information on exposures and potential confounders                                                                     | Done: page 6, 7                        |
|                          |     | (b) Indicate number of participants with missing data for each variable of interest                                                                                                                          | Done: page 6                           |
|                          |     | (c) Summarise follow-up time (eg, average and total amount)                                                                                                                                                  | Done: page 6                           |
| Outcome data             | 15* | Report numbers of outcome events or summary measures over time                                                                                                                                               | Done: page 7, 8, 14                    |
| Main results             | 16  | (a) Give unadjusted estimates and, if applicable, confounder-adjusted estimates and their precision (eg, 95% confidence interval). Make clear which confounders were adjusted for and why they were included | Done: page 8                           |
|                          |     | (b) Report category boundaries when continuous variables were categorized                                                                                                                                    | Done: page 5                           |
|                          |     | (c) If relevant, consider translating estimates of relative risk into absolute risk for a meaningful time period                                                                                             | Not applicable                         |
| Other analyses           | 17  | Report other analyses done—eg analyses of subgroups and interactions, and sensitivity analyses                                                                                                               | Not applicable                         |
| <b>Discussion</b>        |     |                                                                                                                                                                                                              |                                        |
| Key results              | 18  | Summarise key results with reference to study objectives                                                                                                                                                     | Done: page 8, 9                        |
| Limitations              | 19  | Discuss limitations of the study, taking into account sources of potential bias or imprecision. Discuss both direction and magnitude of any potential bias                                                   | Done: page 9                           |
| Interpretation           | 20  | Give a cautious overall interpretation of results considering objectives, limitations, multiplicity of analyses, results from similar studies, and other relevant evidence                                   | Done: page 9                           |
| Generalisability         | 21  | Discuss the generalisability (external validity) of the study results                                                                                                                                        | Done: page 9, 10                       |
| <b>Other information</b> |     |                                                                                                                                                                                                              |                                        |
| Funding                  | 22  | Give the source of funding and the role of the funders for the present study and, if applicable, for the original study on which the present article is based                                                | Done: page 10                          |

\*Give information separately for exposed and unexposed groups.

**Note:** An Explanation and Elaboration article discusses each checklist item and gives methodological background and published examples of transparent reporting. The STROBE checklist is best used in conjunction with this article (freely available on the Web sites of PLoS Medicine at <http://www.plosmedicine.org/>, Annals of Internal Medicine at <http://www.annals.org/>, and Epidemiology at <http://www.epidem.com/>). Information on the STROBE Initiative is available at <http://www.strobe-statement.org>.

# BMJ Open

## Violent injury predicts poor psychological outcomes after traumatic injury in a hard to reach population: an observational cohort study

|                                 |                                                                                                                                                                                                                                                                                                                                                                                                                                                  |
|---------------------------------|--------------------------------------------------------------------------------------------------------------------------------------------------------------------------------------------------------------------------------------------------------------------------------------------------------------------------------------------------------------------------------------------------------------------------------------------------|
| Journal:                        | <i>BMJ Open</i>                                                                                                                                                                                                                                                                                                                                                                                                                                  |
| Manuscript ID                   | bmjopen-2016-014712.R1                                                                                                                                                                                                                                                                                                                                                                                                                           |
| Article Type:                   | Research                                                                                                                                                                                                                                                                                                                                                                                                                                         |
| Date Submitted by the Author:   | 30-Jan-2017                                                                                                                                                                                                                                                                                                                                                                                                                                      |
| Complete List of Authors:       | Rahtz, Emmylou; University of Exeter, European Centre for Environment and Human Health<br>bhui, kamaldeep; Barts and The London, Centre for Psychiatry<br>Smuk, Melanie; Queen Mary University of London, Centre for Psychiatry, Wolfson Institute<br>Hutchison, Iain; St Bartholomew's & The Royal London Hospital, Oral & Maxillofacial Surgery<br>Korszun, Ania; Barts and The London School of Medicine and Dentistry, Centre for Psychiatry |
| <b>Primary Subject Heading</b>: | Mental health                                                                                                                                                                                                                                                                                                                                                                                                                                    |
| Secondary Subject Heading:      | Epidemiology, Emergency medicine                                                                                                                                                                                                                                                                                                                                                                                                                 |
| Keywords:                       | MENTAL HEALTH, ORTHOPAEDIC & TRAUMA SURGERY, Depression & mood disorders < PSYCHIATRY                                                                                                                                                                                                                                                                                                                                                            |
|                                 |                                                                                                                                                                                                                                                                                                                                                                                                                                                  |

SCHOLARONE™  
Manuscripts

only

## Violent injury predicts poor psychological outcomes after traumatic injury in a hard to reach population: an observational cohort study

**Authors:** Emmylou Rahtz<sup>1</sup>, Kamaldeep Bhui<sup>2</sup>, Melanie Smuk<sup>2</sup>, Iain Hutchison<sup>3</sup>, Ania Korszun<sup>2</sup>

1. Corresponding Author: [e.rahtz@exeter.ac.uk](mailto:e.rahtz@exeter.ac.uk), University of Exeter, European Centre for Environment and Human Health, Knowledge Spa, Royal Cornwall Hospital, Truro, Cornwall, UK, TR1 3HD, Tel: 01872 258153, Fax: 01872 258134
2. Barts and The London School of Medicine and Dentistry, London, UK
3. St Bartholomew's & The Royal London Hospital, London, UK

**Word count:** 2,688

## Abstract

**Background:** People who experience physical trauma face a range of psychosocial outcomes. These may be overlooked by busy clinicians. While some risk factors are understood, understanding of the psychological effects of violent injury remains limited, particularly in UK settings. This study compared psychological outcomes following interpersonal violence and accidental injury, including the persistence of psychological distress.

**Methods:** A questionnaire survey was carried out at two time points of patients admitted to a large teaching hospital in London between July 2012 and April 2014. Participants were consecutive adult patients admitted to the Royal London Hospital with traumatic injuries, with 219 participants at baseline. Follow up survey was eight months later ( $N = 109$ ). Standardised measures assessed symptoms of post-traumatic stress (PTSS) (Acute Stress Disorder Scale, PTSD Checklist) and depression (Hospital Anxiety and Depression Scale).

**Results:** PTSS and depressive symptoms affected 27% and 33% respectively at baseline. At eight months, 27% and 31% respectively reported these symptoms. The repeated measures were assessed with multilevel models: after adjusting for demographic factors, patients with violent injury showed more PTSS ( $OR\ 6.27, 95\%\ CI\ 1.90\ to\ 20.66$ ), and depressive symptoms ( $OR\ 3.12, 95\%\ CI\ 1.08\ to\ 8.99$ ).

**Conclusions:** There were high levels of psychological distress among traumatic injury patients. Violent injuries were associated with an increased risk of both post-traumatic and depressive symptoms. People vulnerable to distress would benefit from psychological support and hospital admission provides a unique opportunity to engage hard to reach groups in interventions.

**Keywords:** mental health, orthopaedic & trauma surgery, depression & mood disorders

## Strengths and limitations of this study

This prospective study accessed a unique and hard to reach urban sample of injured patients, many of whom would typically resist engagement with research[1,2] and health services.[3]

It provides local-level information in a field where prevalences and risk factors vary considerably.

The significant differences in follow-up participant characteristics pose problems, however, the statistical approach minimised the detrimental effects of this bias.

Data on severity of injury were not available for all participants and could not be included in analyses. However, findings from other studies do not support an association between injury severity and PTSD,[4] suggesting injury severity would not have been an important confounder.

The modest sample size prevented further adjustments to the model, such as ethnicity or suspected gang violence.

## Introduction

Violence and injury pose significant public health problems and violence is a leading cause of death and injury worldwide.[5] There are over 700,000 hospital admissions for accidental and violent injuries each year in England,[6] and 9.2% of injuries occur through violence,[7] with higher rates in metropolitan hospitals,[8] in men and those aged 16 to 25.[9]

There is currently no routine assessment of psychological symptoms in trauma settings,[9] and symptoms of psychological distress are rarely identified by clinical staff.[10,11] However, traumatic injuries have psychological as well as physical consequences.[12,13] US studies have reported high rates of psychological distress following trauma such as post-traumatic stress disorder (PTSD) and depression.[14–17] PTSD can occur following exposure to, or witnessing, traumatic events such as death, serious injury or sexual violence. Post traumatic symptoms (PTSS) include disturbing flashbacks, avoiding reminders, feelings of alienation and blame, and hyperarousal and reactivity, which persist for at least a month. Acute symptoms within the first month following trauma are recognised as acute stress disorder (ASD). Depression is a mood disorder characterised by depressed mood or loss of interest or pleasure with neurovegetative and cognitive symptoms and significant impairment.

The prevalence of psychological distress following traumatic injury varies widely in different patient populations and countries, and there are few data available on UK rates.[18] An international review, which included one study of motor vehicle collision patients in the UK, reported PTSS rates between 17.5% and 42% up to six months post-injury; the range was greater still at 12 months, ranging from 2%

1  
2  
3 to 36%.[19] Longitudinal studies show that PTSS prevalence falls over time.[19,20] American and  
4 Australian studies report rates of depressive symptoms ranging from 60% at baseline,[16] to 31% at  
5 six months,[14,16] with rates at one year between 9% and 16%.[12,17] The variation in prevalence is  
6 likely due to differences in location, nature of injury and demographic profile. Although one UK  
7 study of non-violent injuries is in progress,[18] more studies are needed to plan NHS care.  
8  
9  
10

### 11 ***Vulnerability to violent injury***

12 Conflict in the world is increasing, not just in wars but also in civilian settings, through violent  
13 protests, football match violence, armed robbery and street gangs. Civilians injured through violence  
14 are at greater risk of PTSS and more persistent symptoms than those who experience non-violent  
15 injuries.[12,14,21,22] However, there is conflicting evidence on whether violent injury is associated  
16 with depressive symptoms.[14,23] Better recognition and treatment of those at risk of psychological  
17 sequelae would improve their quality of life and functioning.  
18  
19  
20  
21  
22

23 Certain groups are more vulnerable to violent injury, including socio-economically deprived people,  
24 ethnic minorities, and young men,[8,24] and deprivation is often a determinant of violent injuries  
25 with violence being used to secure more resources or to protest about deprivation.[25] Rates of  
26 both violence and poor mental health are high in deprived urban areas.[26] For example, people in  
27 South East London have much higher rates of exposure to trauma than those in other European  
28 inner cities, as well as higher rates of PTSS, mental disorder and substance abuse. [27,28] In Hackney,  
29 East London, 9% of men report belonging to a gang compared with 1% across Britain[29] and East  
30 London boroughs are among those with the highest deprivation in England.[30] Hard to reach  
31 groups – including ethnic minorities, survivors of violence, people living in disadvantaged areas,  
32 those with mental health problems and youths at risk of criminal and gang involvement – are under-  
33 researched,[1] and tend to resist engaging with researchers[2] as well as health services. [3]  
34  
35  
36  
37  
38  
39  
40  
41

42 The variation in rates of psychological distress and the particular challenges in inner cities  
43 demonstrate the need for more 'local thinking' on mental health.[28] In this study, we tested the  
44 hypothesis that violent injury is associated with both depressive symptoms and PTSS, and assessed  
45 risk factors for persistence of PTSS and depressive symptoms in patients attending a teaching  
46 hospital and major trauma centre in East London.  
47  
48  
49  
50

### 51 **Methods**

52 This was an observational cohort study of inpatients admitted following accidental or violent injury.  
53  
54  
55  
56  
57  
58  
59  
60

### Setting

Recruitment took place at the Royal London Hospital between July 2012 and April 2014. Participants were identified from consecutive patients discussed at bi-weekly multidisciplinary meetings of the major trauma and oral and maxillofacial surgery teams.

### Participants

The inclusion criteria were: admitted as hospital inpatients under major trauma or oral and maxillofacial trauma; aged 18 or more; English-speaking. The exclusion criteria were: active psychosis; admission following deliberate self-harm; under the influence of alcohol or illegal substances; cognitive impairment based on a Glasgow Coma Score (GCS) below 15 and on the advice of clinical staff.

All participants provided informed consent in writing. Baseline measures were collected in hospital with a follow-up postal questionnaire at eight months. All measures were self-report questionnaires, and we used published thresholds to identify clinically significant symptoms.

### Measures

Baseline PTSS were measured using the Acute Stress Disorder Scale (ASDS),<sup>[31]</sup> using a threshold of scores  $\geq 56$  which the measure's creators found to be the most accurate predictor of subsequently developing PTSD. Follow up PTSS were measured using the PTSD Checklist – Specific version (PCL-S),<sup>[32]</sup> with a threshold of scores  $\geq 45$ . A psychometric analysis of the PCL-S among civilian trauma patients identified this threshold as having the highest diagnostic efficiency.<sup>[32]</sup> Depressive symptoms at baseline and follow up were measured using the Hospital Anxiety and Depression Scale (HADS),<sup>[33]</sup> with a threshold of scores  $\geq 8$ . This threshold has been widely used and reported to have good sensitivity for identifying psychiatric morbidity.<sup>[17,34,35]</sup> Mechanism of injury was established from clinical information and provided a binary exposure variable of violent or accidental injury. Injury Severity Scores (ISS) were collected from clinical records in major trauma, but were not available for oral and maxillofacial trauma patients, and therefore could not be used in analyses. Demographic information was also collected.

### Statistical analysis

Using previous findings on trauma survivors,<sup>[36]</sup> it was calculated that a sample size of 67 in each group was required to test the hypothesis that mean scores on the PCL-S would be at least five points higher among participants injured through violence than among those injured accidentally. Calculations used a two-sided significance of 0.05 and a power of 0.9. Smaller sample sizes were required for the HADS. Higher numbers were sought at baseline because of anticipated difficulties in following up participants.

1  
2  
3 Sensitivity analyses used univariate logistic regressions to explore differences in follow up. To  
4 understand simple associations in the data, we used Chi squared tests and univariate logistic  
5 regressions. To test the longitudinal hypotheses, we used logistic multilevel models for repeated  
6 measures, with bootstrapping to produce more robust confidence intervals. Multilevel models  
7 allowed all participants' questionnaires to be included in the final statistical models whether  
8 participants had contributed to one or both waves, thus increasing statistical power. Missing data  
9 were not imputed. Outcomes for PTSS and depressive symptoms were assessed separately. When  
10 adjusting multilevel models, they were subjected to a likelihood ratio test after estimation to ensure  
11 optimal modelling of the variation.  
12  
13

14  
15  
16  
17  
18 We considered P values of less than 0.05 to be statistically significant. Statistical analyses were  
19 carried out using Stata statistical software (version 14). Power calculations were carried out using  
20 G\*Power (version 3.1.7).  
21  
22

## 23 24 Results

### 25 26 *Description of the data*

27  
28 Of 829 patients admitted to the ward during the study period (July 2012 to April 2014), 467 met the  
29 study criteria. Of these 467, 225 (48.2%) consented and were recruited to the study, 219 (46.9%) of  
30 whom provided useable baseline data. Baseline measures were collected within 21 days after injury  
31 (mean days 4.27, 95% CI 3.72 to 4.82). The main reason patients were excluded was a lack of an  
32 opportunity to approach patients due to surgical or rehabilitation procedures, or excessive pain or  
33 nausea (22.9%,  $N = 190$ ). Recruitment to the study did not differ by age or gender.  
34  
35

36  
37  
38 Of the 219 baseline participants, 109 (49.8%) responded to follow up at eight months (mean days  
39 228.23, 95% CI 218.18 to 238.28), providing a total of 328 questionnaires for use in multilevel  
40 models. Reasons for loss to follow up were not known.  
41  
42

43  
44 There were significant group differences in those who did follow up. Participants injured through  
45 interpersonal violence were significantly less likely to respond to follow up ( $OR\ 0.29$ , 95% CI 0.16 to  
46 0.52), as were those with clinically significant PTSS ( $OR\ 0.36$ , 95% CI 0.19 to 0.67) or depressive  
47 symptoms ( $OR\ 0.40$ , 95% CI 0.22 to 0.72) at baseline.  
48  
49  
50  
51  
52  
53  
54  
55  
56  
57  
58  
59  
60



### Sample characteristics

Participants were predominantly male and young; over a third of participants had been injured through interpersonal violence (Table 1).

|                     |                        | Violent injury/Total | (%)    |
|---------------------|------------------------|----------------------|--------|
| <b>Total sample</b> |                        | 76/219               | (34.7) |
| <b>Gender</b>       | Male                   | 66/166               | (39.8) |
|                     | Female                 | 10/53                | (18.9) |
| <b>Age</b>          | 18-25                  | 29/57                | (50.9) |
|                     | 26-35                  | 25/59                | (42.4) |
|                     | 36-45                  | 16/43                | (37.2) |
|                     | 46-65                  | 5/42                 | (11.9) |
|                     | 66+                    | 1/18                 | (5.6)  |
| <b>Ethnicity</b>    | White, White British   | 40/163               | (24.5) |
|                     | Black, Black British   | 18/23                | (78.3) |
|                     | Asian, Asian British   | 9/17                 | (52.9) |
|                     | Mixed, Multiple, Other | 9/16                 | (56.3) |

Table 1: Proportion of the sample injured violently overall and within each demographic group

Violent injury was more common among young, male and ethnic minority groups. Among the violently injured group, 34 (44.7%) had been injured through suspected gang violence.

### Outcome data

More than one quarter of participants reported PTSS, both among all baseline participants, and among those responding at eight months (Figure 1). PTSS were more common after violent injury. Exact values are provided in Supplementary table 1.

Almost one third of participants reported depressive symptoms at baseline and at eight months (Figure 2). Those injured violently were more likely to have depressive symptoms. Exact values are provided in Supplementary table 2.

### Main results

In longitudinal models, violent injury significantly increased the odds of PTSS (unadjusted *OR* 6.41, 95% *CI* 2.05 to 20.04; adjusted for age and gender *OR* 6.27, 95% *CI* 1.90 to 20.66) and depressive symptoms (unadjusted *OR* 3.47, 95% *CI* 1.26 to 9.57; adjusted for age and gender *OR* 3.12, 95% *CI* 1.08 to 8.99).

## Discussion

### *Principal findings*

This is the first UK prospective study of the persistence of psychological distress in people admitted with injuries to an inner city major trauma centre. The prevalence of both PTSS and depressive symptoms was high at baseline and follow up, with over a quarter of participants experiencing clinically significant symptoms of PTSS and up to a third reporting clinically significant symptoms of depression. These figures are likely to be underestimates as follow-up rates among those with psychological distress were lower. These rates are substantially higher than the 5.5% prevalence of PTSD in a London community sample[27] and 11.4% prevalence of depressive symptoms in the UK general population.[37] A large proportion of participants in this study represent a group that is hard to engage in follow up and into research studies. The sample comprised predominantly young men and over a third of participants had been injured through interpersonal violence. Violent injury was more common among young, male and ethnic minority groups and 44.7% of these individuals had been injured through suspected gang violence.

Previous studies in other countries have reported that rates of psychological distress following injury decrease over time.[19,20] However, in this population, symptoms persisted and this may be partly due to the high proportion of participants injured through violence, as PTSS have been shown to remain high among victims of violence.[12,22] We found that the prevalence of depressive symptoms in the overall sample also remained high, which has not been described previously. Those injured violently may have had ongoing experiences of violence, contributing to the persistence of distress.

Violent injury was a significant risk factor for both PTSS and depressive symptoms, increasing the odds of PTSS by a factor of six (*OR* 6.27, *95% CI* 1.90 to 20.66), and the odds of depressive symptoms by a factor of three (*OR* 3.12, *95% CI* 1.08 to 8.99). This increased risk of depressive symptoms following violent injury accords with one previous study.[23]

The sample included in this study provides a unique insight into the psychological needs of trauma patients in an East London hospital setting, many of whom are hard to reach. There were limitations in follow-up, however, this suggests that the prevalences reported at follow up are likely to be an underestimate. This reinforces the need for routine assessment, intervention and signposting to support services in this population. It was not possible to use a clinical interview to confirm suspected psychiatric diagnoses. Further limitations include the inability to consider variables in the analyses such as severity of injury, experiences of trauma following discharge, ethnicity, or suspected gang violence.

### *Implications*

Given the high prevalence and persistence of distress in injury victims, there are clearly unidentified and unmet needs. In the high pressure environment of trauma care, and in longer term recovery from trauma, remarkably little attention is paid to mental health. NHS guidelines favour 'watchful waiting' for PTSS, with a follow up at one month. However, the present findings suggest that early identification and intervention may be essential in some cases. This concurs with the suggestions of others studying trauma.[38,39]

Traumatic injury patients, including those with significant psychological symptoms, often lack insight into their conditions[40] and can struggle to access counselling services.[41] This puts a greater onus on healthcare workers to identify individuals at risk.[10] Trauma settings need appropriate staff to assess patients' psychological needs and to initiate the delivery of care.

Stereotyped attitudes to trauma patients may create a further barrier to psychological care, with some staff in primary and secondary care believing that patients are themselves responsible for their injuries and that they do not merit psychological support.[41,42] Furthermore, trauma healthcare workers in the UK report that the environment is not conducive to forming therapeutic relationships, and that there is a gap between the ideal, compassionate care they would like to provide, and the time-pressured reality.[43] Gaps can occur in the transfer from secondary to primary care, where there is a need for continuity.[41,44]

Young people involved in gangs are likely to have poor experiences of healthcare, as well as educational and social care systems.[1] Trauma care is one of the key contact points within these systems where intervention may be possible, and it has been suggested that, in areas where gang activity is common, all individuals being treated by health services should be asked about gang membership.[29] Hospital admission may thus provide a unique opportunity for intervention. An American intervention targeted hospitalised teenagers with evidence of violent behaviour and alcohol use: a brief hospital intervention improved violent behaviour and reduced alcohol use at follow up.[45] Such initiatives can be highly effective, and could help seize unique 'teachable moments'.

**Contributors:** ER participated in the design, data collection, data analysis, and manuscript preparation. KB participated in the design, data analysis and manuscript preparation. MS participated in data analysis. IH participated in the receipt of funding, design and data collection. AK participated in the receipt of funding, design, data collection and manuscript preparation. All

1  
2  
3 authors contributed to manuscript development and approved the final version, and agree to be  
4 accountable for all aspects of the work.  
5  
6

7 **Acknowledgements:** The authors acknowledge the support of the Centre for Trauma Sciences at  
8 Queen Mary University of London for enabling fieldwork to be undertaken.  
9

10 **Competing interests:** None declared.  
11

12 **Funding:** This work was supported by The Facial Surgery Research Foundation – Saving Faces.  
13

14 **Ethical approval:** We obtained written ethical approval for the study from the National Research  
15 Ethics Service (NRES), the NHS Health Research Authority, Camberwell St Giles Committee (ID:  
16 12/LO/0351).  
17  
18  
19

20 **Patient consent:** All participants gave written informed consent before taking part. No identifiable  
21 medical information is included in this article.  
22  
23  
24

25 **Data sharing:** No additional data are available.  
26  
27  
28  
29

## 30 References

- 31 1 Bonevski B, Randell M, Paul C, *et al.* Reaching the hard-to-reach: a systematic review of  
32 strategies for improving health and medical research with socially disadvantaged groups.  
33 *BMC Med Res Methodol* 2014;**14**:42. doi:10.1186/1471-2288-14-42  
34
- 35 2 Ellard-Gray A, Jeffrey NK, Choubak M, *et al.* Finding the Hidden Participant: Solutions for  
36 Recruiting Hidden, Hard-to-Reach, and Vulnerable Populations. *Int J Qual Methods*  
37 2015;**14**:1–10. doi:10.1177/1609406915621420  
38
- 39 3 Flanagan SM, Hancock B. 'Reaching the hard to reach'--lessons learned from the VCS  
40 (Voluntary and Community Sector). A qualitative study. *BMC Health Serv Res* 2010;**10**:92.  
41 doi:10.1186/1472-6963-10-92  
42
- 43 4 Gabert-Quillen CA, Fallon W, Delahanty DL. PTSD after traumatic injury: an investigation of  
44 the impact of injury severity and peritraumatic moderators. *J Health Psychol* 2011;**16**:678–87.  
45 doi:10.1177/1359105310386823  
46
- 47 5 Krug EG, Mercy JA, Dahlberg LL, *et al.* World report on violence and health. *Biomedica*  
48 2002;**22 Suppl 2**:327–36. doi:10.1136/jech.57.12.994-a  
49
- 50 6 HSCIC. Hospital Episode Statistics: Admitted Patient Care, England 2014-2015: External causes.  
51 2015;:1–34. <http://www.hscic.gov.uk/catalogue/PUB19124> (accessed 4 Apr2015).  
52
- 53 7 NCEPOD. Trauma: Who Cares? A Report of the National Confidential Enquiry Into Patient  
54 Outcome and Death. 2007. [www.ncepod.org.uk/2007report2/Downloads/SIP\\_report.pdf](http://www.ncepod.org.uk/2007report2/Downloads/SIP_report.pdf)  
55 (accessed 20 May2014).  
56
- 57 8 Hutchison I, Magennis P. The BAOMS United Kingdom survey of facial injuries part 1:  
58  
59  
60

- 1  
2  
3 aetiology and the association with alcohol consumption. *Br J Oral Maxillofac Surg* 1998;**36**:3–  
4 13. doi:dx.doi.org/10.1016/S0266-4356(98)90739-2  
5  
6 9 Morse A, Fisher A, Ross C. Major trauma care in England. London: 2010.  
7 www.nao.org.uk/trauma2010 (accessed 20 May2014).  
8  
9 10 Bolduc A, Hwang B, Hogan C, *et al*. Identification and referral of patients at risk for post-  
10 traumatic stress disorder: A literature review and retrospective analysis. *Am Surg*  
11 2015;**81**:904–8.  
12  
13 11 Islam S, Hooi H, Hoffman GR. Presence of pre-existing psychological comorbidity in a group of  
14 facially injured patients: a preliminary investigation. *J Oral Maxillofac Surg* 2009;**67**:1889–94.  
15 doi:10.1016/j.joms.2009.04.044  
16  
17 12 Bryant RA, O'Donnell ML, Creamer M, *et al*. The psychiatric sequelae of traumatic injury. *Am J*  
18 *Psychiatry* 2010;**167**:312–20. doi:10.1176/appi.ajp.2009.09050617  
19  
20 13 Craig A, Tran Y, Guest R, *et al*. Psychological impact of injuries sustained in motor vehicle  
21 crashes: systematic review and meta-analysis. *BMJ Open* 2016;**6**:e011993.  
22 doi:10.1136/bmjopen-2016-011993  
23  
24 14 Shih R, Schell T. Prevalence of PTSD and Major Depression Following Trauma-Center  
25 Hospitalization. *J Trauma* 2010;**69**:1560–6. doi:10.1097/TA.0b013e3181e59c05  
26  
27 15 Zatzick DF, Rivara FP, Nathens AB, *et al*. A nationwide US study of post-traumatic stress after  
28 hospitalization for physical injury. *Psychol Med* 2007;**37**:1469–80.  
29 doi:10.1017/S0033291707000943  
30  
31 16 Holbrook T. Outcome after major trauma: discharge and 6-month follow-up results from the  
32 Trauma Recovery Project. *J Trauma* 1998;**45**. doi:dx.doi.org/10.1097/00005373-199808000-  
33 00018  
34  
35 17 Schnyder U, Moergeli H, Trentz O, *et al*. Prediction of psychiatric morbidity in severely injured  
36 accident victims at one-year follow-up. *Am J Respir Crit Care Med* 2001;**164**:653–6.  
37 doi:http://dx.doi.org/10.1164/ajrccm.164.4.2008087  
38  
39 18 Kendrick D, O'Brien C, Christie N, *et al*. The impact of injuries study. Multicentre study  
40 assessing physical, psychological, social and occupational functioning post injury - a protocol.  
41 *BMC Public Health* 2011;**11**:963. doi:10.1186/1471-2458-11-963  
42  
43 19 O'Donnell ML, Creamer M, Bryant RA, *et al*. Posttraumatic disorders following injury: an  
44 empirical and methodological review. *Clin Psychol Rev* 2003;**23**:587–603. doi:10.1016/S0272-  
45 7358(03)00036-9  
46  
47 20 Haagsma JA, Polinder S, Toet H, *et al*. Beyond the neglect of psychological consequences:  
48 posttraumatic stress disorder increases the non-fatal burden of injury by more than 50%. *Inj*  
49 *Prev* 2011;**16**:A247–A247. doi:10.1136/ip.2010.029215.878  
50  
51 21 Lim BHP, Adams LA, Lilly MM. Self-worth as a mediator between attachment and  
52 posttraumatic stress in interpersonal trauma. *J Interpers Violence* 2012;**27**:2039–61.  
53 doi:10.1177/0886260511431440  
54  
55 22 Johansen VA, Wahl AK, Weisaeth L. Assaulted victims of nondomestic violence in Norway--  
56 injury, crime characteristics and emotions during the assault. *Scand J Caring Sci* 2008;**22**:445–  
57 54. doi:10.1111/j.1471-6712.2007.00550.x  
58  
59  
60

- 1  
2  
3 23 DeRoon-Cassini TA, Mancini AD, Rusch MD, *et al.* Psychopathology and resilience following  
4 traumatic injury: a latent growth mixture model analysis. *Rehabil Psychol* 2010;**55**:1–11.  
5 doi:10.1037/a0018601  
6  
7 24 Lee KH. Interpersonal violence and facial fractures. *J Oral Maxillofac Surg* 2009;**67**:1878–83.  
8 doi:10.1016/j.joms.2009.04.117  
9  
10 25 Herrenkohl TI, Maguin E, Hill KG, *et al.* Developmental risk factors for youth violence. *J*  
11 *Adolesc Health* 2000;**26**:176–86. doi:dx.doi.org/10.1016/S1054-139X(99)00065-8  
12  
13 26 Hatch SL, Frissa S, Verdecchia M, *et al.* Identifying socio-demographic and socioeconomic  
14 determinants of health inequalities in a diverse London community: the South East London  
15 Community Health (SELCoH) study. *BMC Public Health* 2011;**11**:861. doi:10.1186/1471-2458-  
16 11-861  
17  
18 27 Frissa S, Hatch SL, Gazard B, *et al.* Trauma and current symptoms of PTSD in a South East  
19 London community. *Soc Psychiatry Psychiatr Epidemiol* 2013;**48**:1199–209.  
20 doi:10.1007/s00127-013-0689-8  
21  
22 28 Hatch SL, Woodhead C, Frissa S, *et al.* Importance of Thinking Locally for Mental Health: Data  
23 from Cross-Sectional Surveys Representing South East London and England. *PLoS One* 2012;**7**.  
24 doi:10.1371/journal.pone.0048012  
25  
26 29 Coid JW, Ullrich S, Keers R, *et al.* Gang membership, violence, and psychiatric morbidity. *Am J*  
27 *Psychiatry* 2013;**170**:985–93. doi:10.1176/appi.ajp.2013.12091188  
28  
29 30 McLennan D, Barnes H, Noble M, *et al.* The English Indices of Deprivation 2010. London: 2010.  
30  
31 31 Bryant RA, Moulds ML, Guthrie RM. Acute Stress Disorder Scale: A Self-Report Measure of  
32 Acute Stress Disorder. *Psychol Assess* 2000;**12**:61–8. doi:10.1037//1040-3590.12.1.61  
33  
34 32 Blanchard E. Psychometric properties of the PTSD checklist (PCL). *Behav Res Ther*  
35 1996;**34**:669–73. doi:10.1016/0005-7967(96)00033-2  
36  
37 33 Zigmond AS, Snaith RP. The Hospital Anxiety and Depression Scale. *Acta Psychiatr Scand*  
38 1983;**67**:361–70. doi:dx.doi.org/10.1111/j.1600-0447.1983.tb09716.x  
39  
40 34 O'Donnell ML, Creamer MC, Parslow R, *et al.* A predictive screening index for posttraumatic  
41 stress disorder and depression following traumatic injury. *J Consult Clin Psychol* 2008;**76**:923–  
42 32. doi:10.1037/a0012918  
43  
44 35 Sen P, Ross N, Rogers S. Recovering maxillofacial trauma patients: the hidden problems. *J*  
45 *Wound Care* 2001;**10**:53–7. doi:10.12968/jowc.2001.10.3.26062  
46  
47 36 Zatzick D, Roy-Byrne P, Russo J, *et al.* A randomized effectiveness trial of stepped  
48 collaborative care for acutely injured trauma survivors. *Arch Gen Psychiatry* 2004;**61**:498–506.  
49 doi:10.1001/archpsyc.61.5.498  
50  
51 37 Crawford J, Henry J. Normative data for the HADS from a large non-clinical sample. *Br J Clin*  
52 *Psychol* 2001;**40**:429–34. doi:dx.doi.org/10.1348/014466501163904  
53  
54 38 Alarcon LH, Germain A, Clontz AS, *et al.* Predictors of acute posttraumatic stress disorder  
55 symptoms following civilian trauma: highest incidence and severity of symptoms after assault.  
56 *J Trauma Acute Care Surg* 2012;**72**:629–35-7. doi:10.1097/TA.0b013e31824416aa  
57  
58 39 Stephens KA, Sue S, Roy-Byrne P, *et al.* Ethnoracial variations in acute PTSD symptoms among  
59  
60

- 1  
2  
3 hospitalized survivors of traumatic injury. *J Trauma Stress* 2010;**23**:384–92.  
4 doi:10.1002/jts.20534  
5  
6 40 Wong E, Kennedy D. Making sense of posttraumatic stress disorder: Illness perceptions  
7 among traumatic injury survivors. *Psychol Trauma* 2011;**3**:67–76. doi:10.1037/a0020587  
8  
9 41 Christie N, Beckett K, Earthy S, *et al.* Seeking support after hospitalisation for injury: a nested  
10 qualitative study of the role of primary care. *Br J Gen Pract* 2016;**66**:e24–31.  
11 doi:10.3399/bjgp15X688141  
12  
13 42 Shepherd JP. Victims of Personal Violence: The Relevance of Symonds' Model of Psychological  
14 Response and Loss-Theory. *Br J Soc Work* 1990;**20**:309–  
15 32. <http://bjsw.oxfordjournals.org/content/20/4/309.short> (accessed 13 Mar2013).  
16  
17 43 Beckett K, Earthy S, Slaney J, *et al.* Providing effective trauma care: the potential for service  
18 provider views to enhance the quality of care (qualitative study nested within a multicentre  
19 longitudinal quantitative study). *BMJ Open* 2014;**4**:e005668–e005668. doi:10.1136/bmjopen-  
20 2014-005668  
21  
22 44 Kellezi B, Beckett K, Earthy S, *et al.* Understanding and meeting information needs following  
23 unintentional injury: Comparing the accounts of patients, carers and service providers. *Injury*  
24 2015;**46**:564–71. doi:10.1016/j.injury.2014.11.035  
25  
26 45 Walton MA, Chermack ST, Shope JT, *et al.* Effects of a brief intervention for reducing violence  
27 and alcohol misuse among adolescents: a randomized controlled trial. *JAMA* 2010;**304**:527–  
28 35. doi:10.1001/jama.2010.1066  
29  
30  
31  
32  
33  
34  
35  
36  
37  
38  
39  
40  
41  
42  
43  
44  
45  
46  
47  
48  
49  
50  
51  
52  
53  
54  
55  
56  
57  
58  
59  
60

1  
2  
3  
4  
5  
6  
7  
8  
9  
10  
11  
12  
13  
14  
15  
16  
17  
18  
19  
20  
21  
22  
23  
24  
25  
26  
27  
28  
29  
30  
31  
32  
33  
34  
35  
36  
37  
38  
39  
40  
41  
42  
43  
44  
45  
46  
47  
48  
49  
50  
51  
52  
53  
54  
55  
56  
57  
58  
59  
60

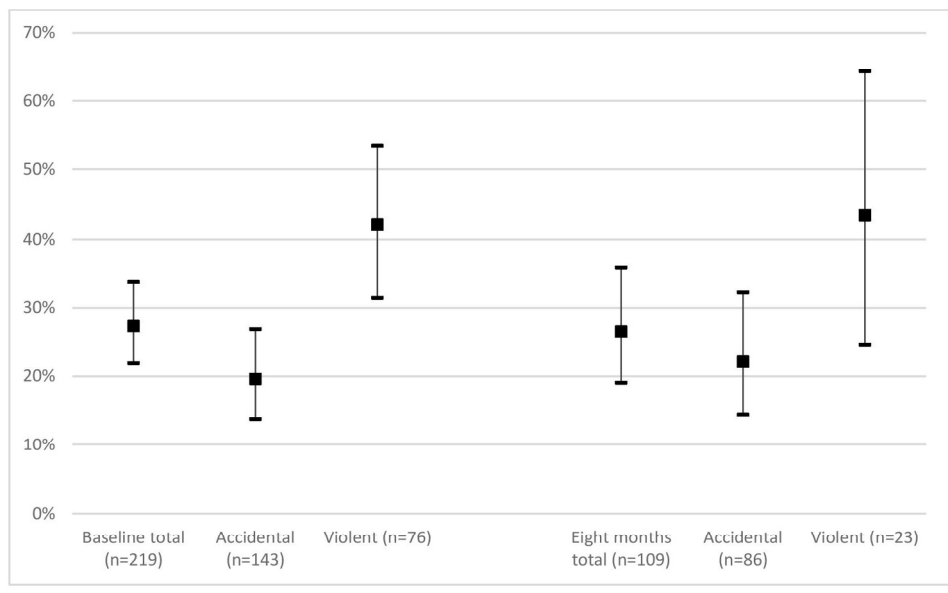

Figure 1: Prevalence of clinically significant PTSS at baseline and eight months, 95% CI. Threshold: ASDS  $\geq 56$  at baseline, PCL-S  $\geq 44$  at eight months.

Figure 1  
169x110mm (300 x 300 DPI)

view only



1  
2  
3  
4  
5  
6  
7  
8  
9  
10  
11  
12  
13  
14  
15  
16  
17  
18  
19  
20  
21  
22  
23  
24  
25  
26  
27  
28  
29  
30  
31  
32  
33  
34  
35  
36  
37  
38  
39  
40  
41  
42  
43  
44  
45  
46  
47  
48  
49  
50  
51  
52  
53  
54  
55  
56  
57  
58  
59  
60

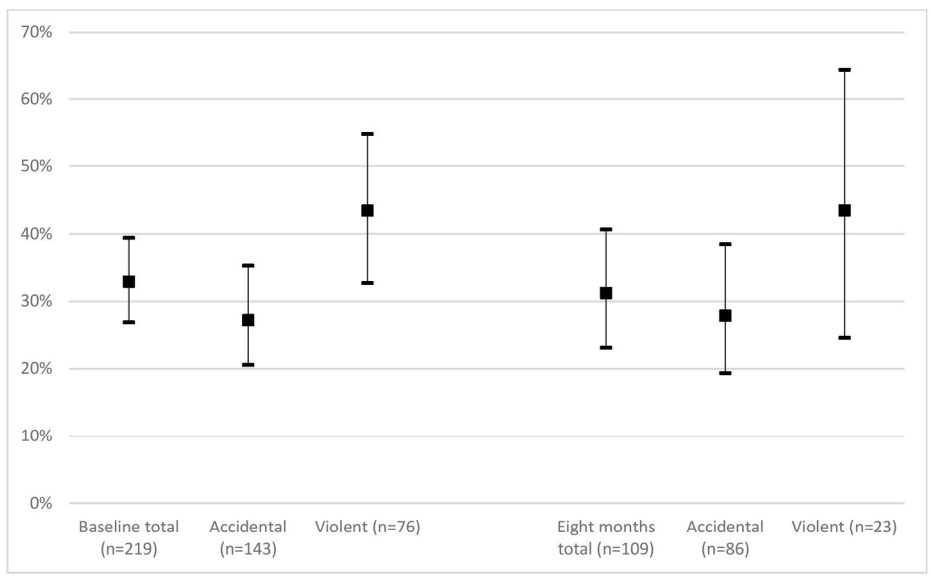

Figure 2: Prevalence of clinically significant depressive symptoms at baseline and eight months, 95% CI. Threshold HADS-D  $\geq 8$ .

Figure 2  
173x114mm (300 x 300 DPI)

View only

## Appendices

Supplementary table 1: Prevalence of clinically significant PTSS at each time point

| Variable  | Values                 | Baseline: ASDS $\geq 56$<br>(N=219) |          | Eight months: PCL-S $\geq 44$<br>(N=109) |          |
|-----------|------------------------|-------------------------------------|----------|------------------------------------------|----------|
| Total     |                        | 60/219                              | (27.40%) | 29/109                                   | (26.61%) |
| Gender    | Male                   | 46/166                              | (27.71%) | 19/79                                    | (24.05%) |
|           | Female                 | 14/53                               | (26.42%) | 10/30                                    | (33.33%) |
| Age       | 18-25                  | 14/57                               | (24.56%) | 6/19                                     | (31.58%) |
|           | 26-35                  | 19/59                               | (32.20%) | 9/30                                     | (30.00%) |
|           | 36-45                  | 13/43                               | (30.23%) | 8/22                                     | (36.36%) |
|           | 46-65                  | 11/42                               | (26.19%) | 5/25                                     | (20.00%) |
|           | 66+                    | 3/18                                | (16.67%) | 1/13                                     | (7.69%)  |
| Ethnicity | White, White British   | 37/163                              | (22.70%) | 20/90                                    | (22.22%) |
|           | Black, Black British   | 12/23                               | (52.17%) | 5/8                                      | (62.50%) |
|           | Asian, Asian British   | 6/17                                | (35.29%) | 2/5                                      | (40.00%) |
|           | Mixed, Multiple, Other | 5/16                                | (31.25%) | 2/6                                      | (33.33%) |
| Mechanism | Accidental injury      | 28/143                              | (19.58%) | 19/86                                    | (22.09%) |
|           | Violent injury         | 32/76                               | (42.11%) | 10/23                                    | (43.48%) |

Supplementary table 2: Prevalence of clinically significant depressive symptoms at each time point

| Variable  | Values                 | Baseline: HADS-D $\geq 8$<br>(N=219) |          | Eight months: HADS-D $\geq 8$<br>(N=109) |          |
|-----------|------------------------|--------------------------------------|----------|------------------------------------------|----------|
| Total     |                        | 72/219                               | (32.88%) | 34/109                                   | (31.19%) |
| Gender    | Male                   | 51/166                               | (30.72%) | 24/79                                    | (30.38%) |
|           | Female                 | 21/53                                | (39.62%) | 10/30                                    | (33.33%) |
| Age       | 18-25                  | 19/57                                | (33.33%) | 6/19                                     | (31.58%) |
|           | 26-35                  | 19/59                                | (32.20%) | 12/30                                    | (40.00%) |
|           | 36-45                  | 18/43                                | (41.86%) | 8/22                                     | (36.36%) |
|           | 46-65                  | 13/42                                | (30.95%) | 5/25                                     | (20.00%) |
|           | 66+                    | 3/18                                 | (16.67%) | 3/13                                     | (23.08%) |
| Ethnicity | White, White British   | 43/163                               | (26.38%) | 23/90                                    | (25.56%) |
|           | Black, Black British   | 13/23                                | (56.52%) | 7/8                                      | (87.50%) |
|           | Asian, Asian British   | 10/17                                | (58.82%) | 2/5                                      | (40.00%) |
|           | Mixed, Multiple, Other | 6/16                                 | (37.50%) | 2/6                                      | (33.33%) |
| Mechanism | Accidental injury      | 39/143                               | (27.27%) | 24/86                                    | (27.91%) |
|           | Violent injury         | 33/76                                | (43.42%) | 10/23                                    | (43.48%) |

STROBE Statement—for article ‘Violent injury predicts poor psychological outcomes after traumatic injury in a hard to reach population: an observational cohort study’

Checklist of items that should be included in reports of *cohort studies*

|                              | Item No | Recommendation                                                                                                                                                                       | Status          |
|------------------------------|---------|--------------------------------------------------------------------------------------------------------------------------------------------------------------------------------------|-----------------|
| <b>Title and abstract</b>    | 1       | (a) Indicate the study’s design with a commonly used term in the title or the abstract                                                                                               | Done: page 2    |
|                              |         | (b) Provide in the abstract an informative and balanced summary of what was done and what was found                                                                                  | Done: page 2    |
| <b>Introduction</b>          |         |                                                                                                                                                                                      |                 |
| Background/rationale         | 2       | Explain the scientific background and rationale for the investigation being reported                                                                                                 | Done: page 3,4  |
| Objectives                   | 3       | State specific objectives, including any prespecified hypotheses                                                                                                                     | Done: page 4    |
| <b>Methods</b>               |         |                                                                                                                                                                                      |                 |
| Study design                 | 4       | Present key elements of study design early in the paper                                                                                                                              | Done: page 4    |
| Setting                      | 5       | Describe the setting, locations, and relevant dates, including periods of recruitment, exposure, follow-up, and data collection                                                      | Done: page 5    |
| Participants                 | 6       | (a) Give the eligibility criteria, and the sources and methods of selection of participants. Describe methods of follow-up                                                           | Done: page 5    |
|                              |         | (b) For matched studies, give matching criteria and number of exposed and unexposed                                                                                                  | Not applicable  |
| Variables                    | 7       | Clearly define all outcomes, exposures, predictors, potential confounders, and effect modifiers. Give diagnostic criteria, if applicable                                             | Done: page 5    |
| Data sources/<br>measurement | 8*      | For each variable of interest, give sources of data and details of methods of assessment (measurement). Describe comparability of assessment methods if there is more than one group | Done: page 5    |
| Bias                         | 9       | Describe any efforts to address potential sources of bias                                                                                                                            | Done: page 5    |
| Study size                   | 10      | Explain how the study size was arrived at                                                                                                                                            | Done: page 5    |
| Quantitative variables       | 11      | Explain how quantitative variables were handled in the analyses. If applicable, describe which groupings were chosen and why                                                         | Done: page 5    |
| Statistical methods          | 12      | (a) Describe all statistical methods, including those used to control for confounding                                                                                                | Done: page 5, 6 |
|                              |         | (b) Describe any methods used to examine subgroups and interactions                                                                                                                  | Done: page 5, 6 |
|                              |         | (c) Explain how missing data were addressed                                                                                                                                          | Done: page 5    |
|                              |         | (d) If applicable, explain how loss to follow-up was addressed                                                                                                                       | Done: page 5    |
|                              |         | (e) Describe any sensitivity analyses                                                                                                                                                | Done: page 5    |
| <b>Results</b>               |         |                                                                                                                                                                                      |                 |
| Participants                 | 13*     | (a) Report numbers of individuals at each stage of study— eg numbers potentially eligible, examined for eligibility,                                                                 | Done: page 6    |

|                          |     |                                                                                                                                                                                                              |                                        |
|--------------------------|-----|--------------------------------------------------------------------------------------------------------------------------------------------------------------------------------------------------------------|----------------------------------------|
|                          |     | confirmed eligible, included in the study, completing follow-up, and analysed                                                                                                                                |                                        |
|                          |     | (b) Give reasons for non-participation at each stage                                                                                                                                                         | Done (to the extent possible) : page 6 |
|                          |     | (c) Consider use of a flow diagram                                                                                                                                                                           | No flow diagram                        |
| Descriptive data         | 14* | (a) Give characteristics of study participants (eg demographic, clinical, social) and information on exposures and potential confounders                                                                     | Done: page 6, 7                        |
|                          |     | (b) Indicate number of participants with missing data for each variable of interest                                                                                                                          | Done: page 6                           |
|                          |     | (c) Summarise follow-up time (eg, average and total amount)                                                                                                                                                  | Done: page 6                           |
| Outcome data             | 15* | Report numbers of outcome events or summary measures over time                                                                                                                                               | Done: page 7, 8, 14                    |
| Main results             | 16  | (a) Give unadjusted estimates and, if applicable, confounder-adjusted estimates and their precision (eg, 95% confidence interval). Make clear which confounders were adjusted for and why they were included | Done: page 8                           |
|                          |     | (b) Report category boundaries when continuous variables were categorized                                                                                                                                    | Done: page 5                           |
|                          |     | (c) If relevant, consider translating estimates of relative risk into absolute risk for a meaningful time period                                                                                             | Not applicable                         |
| Other analyses           | 17  | Report other analyses done—eg analyses of subgroups and interactions, and sensitivity analyses                                                                                                               | Not applicable                         |
| <b>Discussion</b>        |     |                                                                                                                                                                                                              |                                        |
| Key results              | 18  | Summarise key results with reference to study objectives                                                                                                                                                     | Done: page 8, 9                        |
| Limitations              | 19  | Discuss limitations of the study, taking into account sources of potential bias or imprecision. Discuss both direction and magnitude of any potential bias                                                   | Done: page 9                           |
| Interpretation           | 20  | Give a cautious overall interpretation of results considering objectives, limitations, multiplicity of analyses, results from similar studies, and other relevant evidence                                   | Done: page 9                           |
| Generalisability         | 21  | Discuss the generalisability (external validity) of the study results                                                                                                                                        | Done: page 9, 10                       |
| <b>Other information</b> |     |                                                                                                                                                                                                              |                                        |
| Funding                  | 22  | Give the source of funding and the role of the funders for the present study and, if applicable, for the original study on which the present article is based                                                | Done: page 10                          |

\*Give information separately for exposed and unexposed groups.

**Note:** An Explanation and Elaboration article discusses each checklist item and gives methodological background and published examples of transparent reporting. The STROBE checklist is best used in conjunction with this article (freely available on the Web sites of PLoS Medicine at <http://www.plosmedicine.org/>, Annals of Internal Medicine at <http://www.annals.org/>, and Epidemiology at <http://www.epidem.com/>). Information on the STROBE Initiative is available at <http://www.strobe-statement.org>.
