# Supplementary material for: Violent injury predicts poor psychological outcomes after traumatic injury in a hard-to-reach population: an observational cohort study
Source: PubMed Central journal article supplement — BMJ Open. 2017 May 30;7(5):e014712. doi: 10.1136/bmjopen-2016-014712 (PMC5777458; doi:10.1136/bmjopen-2016-014712), 2017-05-30
Supplement: bmjopen-2016-014712supp001.pdf [file bmjopen-2016-014712supp001.pdf]

## Appendices

Supplementary table 1: Prevalence of clinically significant PTSS at each time point

| Variable  | Values                 | Baseline: ASDS $\geq 56$<br>(N=219) |          | Eight months: PCL-S $\geq 44$<br>(N=109) |          |
|-----------|------------------------|-------------------------------------|----------|------------------------------------------|----------|
| Total     |                        | 60/219                              | (27.40%) | 29/109                                   | (26.61%) |
| Gender    | Male                   | 46/166                              | (27.71%) | 19/79                                    | (24.05%) |
|           | Female                 | 14/53                               | (26.42%) | 10/30                                    | (33.33%) |
| Age       | 18-25                  | 14/57                               | (24.56%) | 6/19                                     | (31.58%) |
|           | 26-35                  | 19/59                               | (32.20%) | 9/30                                     | (30.00%) |
|           | 36-45                  | 13/43                               | (30.23%) | 8/22                                     | (36.36%) |
|           | 46-65                  | 11/42                               | (26.19%) | 5/25                                     | (20.00%) |
|           | 66+                    | 3/18                                | (16.67%) | 1/13                                     | (7.69%)  |
| Ethnicity | White, White British   | 37/163                              | (22.70%) | 20/90                                    | (22.22%) |
|           | Black, Black British   | 12/23                               | (52.17%) | 5/8                                      | (62.50%) |
|           | Asian, Asian British   | 6/17                                | (35.29%) | 2/5                                      | (40.00%) |
|           | Mixed, Multiple, Other | 5/16                                | (31.25%) | 2/6                                      | (33.33%) |
| Mechanism | Accidental injury      | 28/143                              | (19.58%) | 19/86                                    | (22.09%) |
|           | Violent injury         | 32/76                               | (42.11%) | 10/23                                    | (43.48%) |

Supplementary table 2: Prevalence of clinically significant depressive symptoms at each time point

| Variable  | Values                 | Baseline: HADS-D $\geq 8$<br>(N=219) |          | Eight months: HADS-D $\geq 8$<br>(N=109) |          |
|-----------|------------------------|--------------------------------------|----------|------------------------------------------|----------|
| Total     |                        | 72/219                               | (32.88%) | 34/109                                   | (31.19%) |
| Gender    | Male                   | 51/166                               | (30.72%) | 24/79                                    | (30.38%) |
|           | Female                 | 21/53                                | (39.62%) | 10/30                                    | (33.33%) |
| Age       | 18-25                  | 19/57                                | (33.33%) | 6/19                                     | (31.58%) |
|           | 26-35                  | 19/59                                | (32.20%) | 12/30                                    | (40.00%) |
|           | 36-45                  | 18/43                                | (41.86%) | 8/22                                     | (36.36%) |
|           | 46-65                  | 13/42                                | (30.95%) | 5/25                                     | (20.00%) |
|           | 66+                    | 3/18                                 | (16.67%) | 3/13                                     | (23.08%) |
| Ethnicity | White, White British   | 43/163                               | (26.38%) | 23/90                                    | (25.56%) |
|           | Black, Black British   | 13/23                                | (56.52%) | 7/8                                      | (87.50%) |
|           | Asian, Asian British   | 10/17                                | (58.82%) | 2/5                                      | (40.00%) |
|           | Mixed, Multiple, Other | 6/16                                 | (37.50%) | 2/6                                      | (33.33%) |
| Mechanism | Accidental injury      | 39/143                               | (27.27%) | 24/86                                    | (27.91%) |
|           | Violent injury         | 33/76                                | (43.42%) | 10/23                                    | (43.48%) |
